# Supplementary material for: Sensitive electrochemical sensors for simultaneous determination of ascorbic acid, dopamine, and uric acid based on Au@Pd-reduced graphene oxide nanocomposites
Source: Royal Society of Chemistry journal article supplement (doi:10.1039/c4nr01774a), 2014-06-26
Supplement: c4nr01774a1.pdf [file c4nr01774a1.pdf]

Supporting Information

for

**Sensitive electrochemical sensors for simultaneous determination of ascorbic acid, dopamine, and uric acid based on Au@Pd–reduced graphene oxide nanocomposites**

Jingjing Jiang and Xuezhong Du\*

Key Laboratory of Mesoscopic Chemistry (Ministry of Education), State Key Laboratory of Coordination Chemistry, and School of Chemistry and Chemical Engineering, Nanjing University, Nanjing 210093, P. R. China

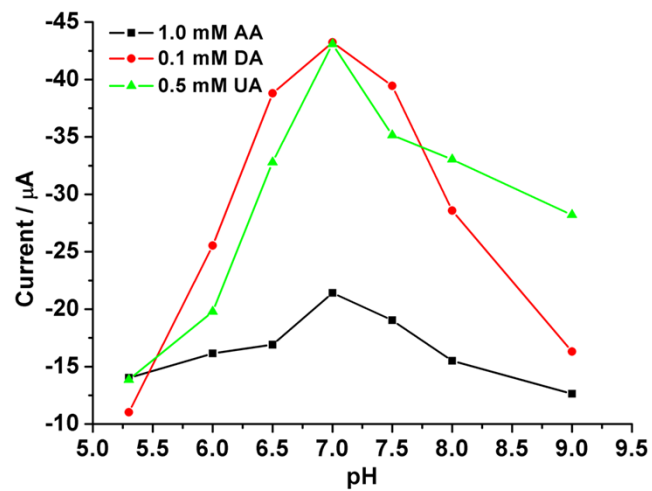

**Fig. S1** Optimization of pH for the detection of 1.0 mM AA, 0.1 mM DA, and 0.5 mM UA by the DPV method in 0.1 M PBS solutions at a scan rate of  $0.1 \text{ V s}^{-1}$ .

**Table S1** Summary of various nanomaterial-based electrochemical sensors for AA, DA, and UA.

| analyte | modified electrode                        | linear range ( $\mu\text{M}$ ) | detection limit ( $\mu\text{M}$ ) | sensitivity ( $\mu\text{A } \mu\text{M}^{-1} \text{ cm}^{-2}$ ) | $R^2$  | RSD (%) | reference |
|---------|-------------------------------------------|--------------------------------|-----------------------------------|-----------------------------------------------------------------|--------|---------|-----------|
| AA      | Au@Pd-RGO/GCE                             | 0.1–1000                       | 0.02                              | 0.31                                                            | 0.9980 | 2.62    | this work |
|         | Pd-CNFs/CPE                               | 50–4000                        | 15                                | –                                                               | 0.9976 | 3.51    | [S1]      |
|         | Fe <sub>3</sub> O <sub>4</sub> @Au-GA/GCE | 4–400                          | 0.3                               | –                                                               | 0.9987 | –       | [S2]      |
|         | N-PCNPs/GCE                               | 80–2000                        | 0.74                              | –                                                               | 0.998  | 2.7     | [S3]      |
|         | TNCs/GCE                                  | 80–1400                        | 14 $\pm$ 0.56                     | 0.17                                                            | 0.998  | 3.1     | [S4]      |
|         | EMGON5-1/CPE                              | 0–1000                         | 1.54                              | 78.63                                                           | 0.9987 | 1.15    | [S5]      |
| DA      | Au@Pd-RGO/GCE                             | 0.01–100                       | 0.002                             | 6.08                                                            | 0.9984 | 1.78    | this work |
|         | Pd-CNFs/CPE                               | 0.5–160                        | 0.2                               | –                                                               | 0.9988 | 2.37    | [S1]      |
|         | Fe <sub>3</sub> O <sub>4</sub> @Au-GA/GCE | 0.5–50                         | 0.02                              | –                                                               | 0.9982 | –       | [S2]      |
|         | N-PCNPs/GCE                               | 0.5–30                         | 0.011                             | –                                                               | 0.997  | 2.5     | [S3]      |
|         | TNCs/GCE                                  | 0.4–60                         | 0.28 $\pm$ 0.02                   | 57.02                                                           | 0.994  | 1.8     | [S4]      |
|         | DNW film                                  | 0.5–500                        | 0.36                              | 0.659                                                           | 0.9857 | –       | [S6]      |
| UA      | Au@Pd-RGO/GCE                             | 0.02–500                       | 0.005                             | 1.22                                                            | 0.9991 | 2.46    | this work |
|         | Pd-CNFs/CPE                               | 2–200                          | 0.7                               | –                                                               | 0.9996 | 3.24    | [S1]      |
|         | Fe <sub>3</sub> O <sub>4</sub> @Au-GA/GCE | 1–300                          | 0.05                              | –                                                               | 0.9956 | –       | [S2]      |
|         | N-PCNPs/GCE                               | 4–50                           | 0.021                             | –                                                               | 0.993  | 3.2     | [S3]      |
|         | TNCs/GCE                                  | 10–70                          | 1.6 $\pm$ 0.05                    | 8.56                                                            | 0.990  | 2.3     | [S4]      |

CNFs, carbon nanofibers

CPE, carbon paste electrode

GA, graphene

N-PCNPs, nitrogen doped porous carbon nanopolyhedra

TNCs, templated nanoporous carbons

EMGON, electroactive mesoporous gold-organosilica nanocomposites

DNW, nitrogen incorporated diamond nanowire

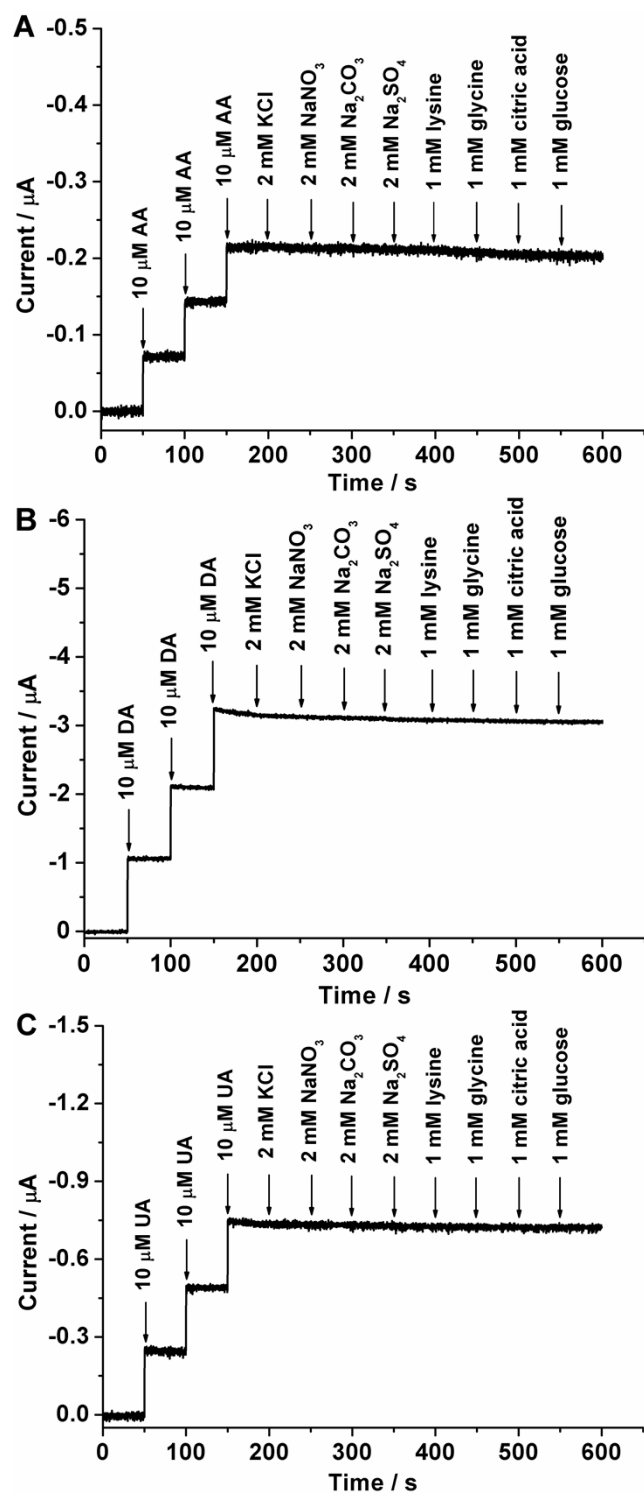

**Fig. S2** Amperometric responses of Au@Pd-RGO/GCE upon successive addition of (A) 10  $\mu\text{M}$  AA, (B) 10  $\mu\text{M}$  DA, (C) 10  $\mu\text{M}$  UA, and other chemicals to 0.1 M PBS (pH 7.0). Applied potential of 0.03, 0.2, and 0.37 V for AA, DA, and UA, respectively.

**Table S2** Results for determination of AA, DA, and UA in urine samples.

| sample  | analyte | detected<br>( $\mu\text{M}$ ) | added<br>( $\mu\text{M}$ ) | found<br>( $\mu\text{M}$ ) | recovery<br>(%, $n = 5$ ) | RSD<br>(%, $n = 5$ ) |
|---------|---------|-------------------------------|----------------------------|----------------------------|---------------------------|----------------------|
| urine 1 | AA      | –                             | 50.0                       | 49.1                       | 98.2                      | 2.0                  |
|         | DA      | –                             | 20.0                       | 20.5                       | 102.5                     | 1.5                  |
|         | UA      | 12.3                          | 40.0                       | 50.8                       | 97.1                      | 1.0                  |
| urine 2 | AA      | –                             | 80.0                       | 79.3                       | 99.1                      | 1.2                  |
|         | DA      | –                             | 25.0                       | 25.4                       | 101.6                     | 1.3                  |
|         | UA      | 37.5                          | 20.0                       | 56.7                       | 98.6                      | 1.9                  |
| urine 3 | AA      | –                             | 100.0                      | 98.5                       | 98.5                      | 1.3                  |
|         | DA      | –                             | 40.0                       | 40.4                       | 101.0                     | 0.7                  |
|         | UA      | 26.4                          | 20.0                       | 47.2                       | 101.7                     | 1.6                  |

### References

- S1 J. S. Huang, Y. Liu, H. Q. Hou and T. Y. You, *Biosens. Bioelectron.*, 2008, **24**, 632-637.
- S2 M. L. Liu, Q. Chen, C. L. Lai, Y. Y. Zhang, J. H. Deng, H. T. Li and S. Z. Yao, *Biosens. Bioelectron.*, 2013, **48**, 75-81.
- S3 P. B. Gai, H. J. Zhang, Y. S. Zhang, W. Liu, G. B. Zhu, X. H. Zhang and J. H. Chen, *J. Mater. Chem. B*, 2013, **1**, 2742-2749.
- S4 S. H. Zhou, H. Y. Shi, X. Feng, K. W. Xue and W. B. Song, *Biosens. Bioelectron.*, 2013, **42**, 163-169.
- S5 C. J. Weng, P. H. Hsu, S. C. Hsu, C. H. Chang, W. I. Hung, P. S. Wu and J. M. Yeh, *J. Mater. Chem. B*, 2013, **1**, 4983-4991.
- S6 J. Shalini, K. J. Sankaran, C. L. Dong, C. Y. Lee, N. H. Tai and I. N. Lin, *Nanoscale*, 2013, **5**, 1159-1167.
